# Supplementary material for: Energization of the Ring Current by Substorms
Source: PubMed Central journal article supplement (PMC6360953; doi:10.1029/2018ja025766), 2018-10-08

H<sup>+</sup>: 1 eV - 50 keV    H<sup>+</sup>: 50 - 660 keV    O<sup>+</sup>: 1 eV - 50 keV    O<sup>+</sup>: 120 - 990 keV    He<sup>+</sup>: 60 - 980 keV

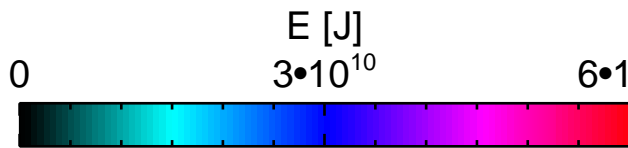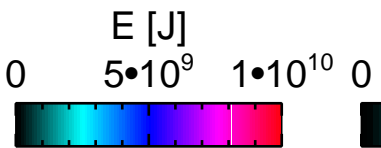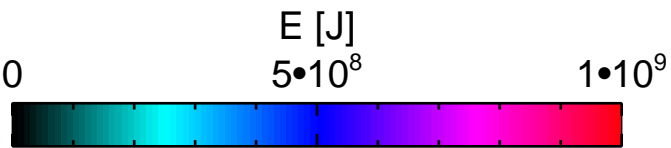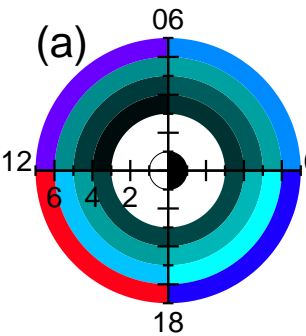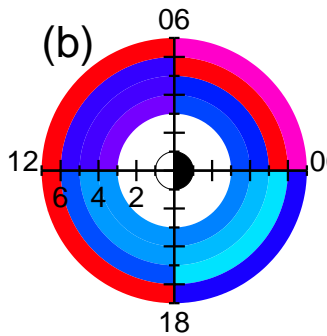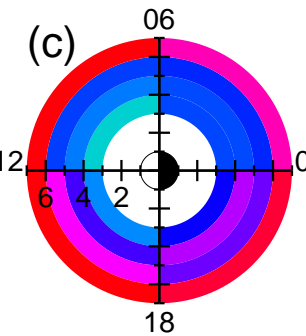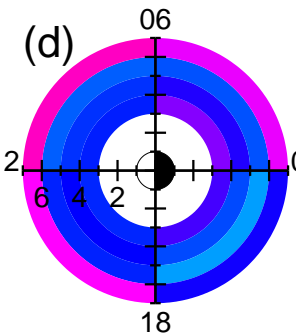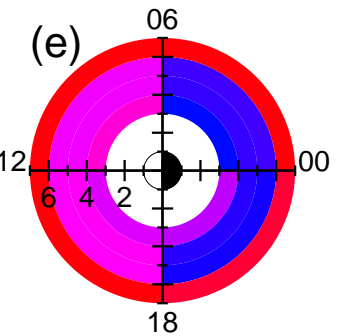

Supplement: JGRA-123-8131-s002.pdf [file JGRA-123-8131-s002.pdf]
